# Supplementary material for: Solvent-free oxidation of dec-1-ene using gold/graphite catalyst using an in situ generated oxidant
Source: Royal Society of Chemistry journal article supplement (doi:10.1039/c4cy01355g), 2014-11-12
Supplement: c4cy01355g1.pdf [file c4cy01355g1.pdf]

**Solvent –free oxidation of dec-1-ene using gold/graphite catalyst using an *in situ* generated oxidant.**

**Supplementary material**

Upendra Nath Gupta,<sup>1,4</sup> Hamed Alshammari,<sup>1,2</sup> Nicholas F. Dummer,<sup>1,3</sup> Robert L. Jenkins,<sup>1</sup>  
Donald Bethell,<sup>1</sup> Graham J. Hutchings<sup>1\*</sup>

<sup>1</sup>Cardiff Catalysis Institute, Cardiff University, Park Place, Cardiff, UK CF10 3AT

<sup>2</sup>Chemistry Department, Faculty of Science, Ha'il University, P. Box 2440, 81451 Ha'il, Saudi Arabia

<sup>3</sup>Present address: Faculty of Science, University of Wollongong, Wollongong, NSW 2522, Australia.

<sup>4</sup>Present address: Coal Chemistry Division, CSIR-North East Institute of Science and Technology, Jorhat - 785006, India.

**Table S1** Effect of the addition of aldehydes on the oxidation of hex-1-ene

| Aldehyde     | Aldehyde amount<br>(mg) | Conversion<br>% | Epoxide selectivity<br>% |
|--------------|-------------------------|-----------------|--------------------------|
| Benzaldehyde | 0                       | 2               | 11.4                     |
|              | 100                     | 3.4             | 56.7                     |
|              | 300                     | 4.8             | 73.1                     |
|              | 500                     | 5.9             | 76.2                     |
| butaldehyde  | 0                       | 2               | 11.4                     |
|              | 100                     | 2.3             | 42                       |
|              | 300                     | 3.1             | 61.1                     |
|              | 500                     | 4.3             | 71.4                     |

Reaction condition: hex-1-ene (10 ml), Au/graphite (0.12g), TBHP ( $0.064 \times 10^{-2}$  mol), 40 °C, 24h.

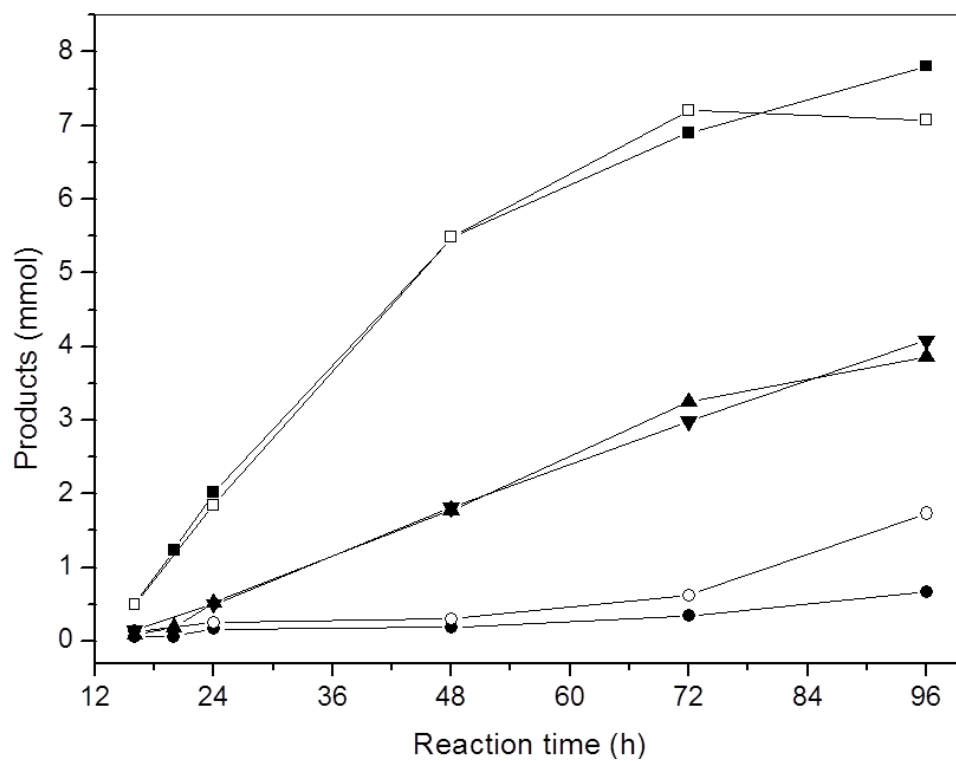

**Figure S1** Effect of the addition of acetophenone on the oxidation of dec-1-ene. Key: ■ epoxide without acetophenone □ epoxide with acetophenone ● 1,2-decanediol without acetophenone ○ 1,2-decanediol with acetophenone ▲ C<sub>7-9</sub> acids without acetophenone ▼ C<sub>7-9</sub> acids with acetophenone. Reaction conditions: Dec-1-ene 53 mmol, AIBN 35 μmol, 1wt% Au/Graphite 0.10 g, acetophenone 1.4 mmol, 90 °C
